# Supplementary material
Source: publisher site journal article supplement (https://www.dovepress.com/article/582171)
Supplement: Supplementary file 1 [file 582171%20Revised%20Supplementary%20Tables%201-2.docx]

**Supplementary table 1. The timeline of the study**

|  | Screening | Active Treatment | | | | | Follow up | |
| --- | --- | --- | --- | --- | --- | --- | --- | --- |
| Visit 0 | Visit 1 | Visit 2~3 | Visit 4 | Visit 5~7 | Visit 8 | Visit 9 | Visit 10 |
| Week | 0 | 1 | 2~3 | 4 | 5~7 | 8 | 12 | 16 |
| Informed Consent | ○ |  |  |  |  |  |  |  |
| Demographic Assessment | ○ |  |  |  |  |  |  |  |
| Vital Signs | ○ | ○ | ○ | ○ | ○ | ○ | ○ |  |
| Physical examination | ○ |  |  |  |  | ○ |  |  |
| Medical & Medication History | ○ |  |  |  |  | ○ |  |  |
| Urinalysis | ○ |  |  |  |  | ○ |  |  |
| Eligibility Criteria Evaluation | ○ | ○ |  |  |  |  |  |  |
| Medication Change Monitoring |  | ○ | ○ | ○ | ○ | ○ | ○ | ○ |
| Intervention (TEA/Sham-TEA) |  | ○ | ○ | ○ | ○ | ○ |  |  |
| Adverse Event Monitoring |  | ○ | ○ | ○ | ○ | ○ | ○ | ○ |
| 3-day bladder diary |  | ○ |  | ○ |  | ○ | ○ | ○ |
| OABSS | ○ | ○ |  | ○ |  | ○ | ○ | ○ |
| KHQ |  | ○ |  | ○ |  | ○ | ○ | ○ |

TEA; Thread Embedding Acupuncture, OABSS; Overactive Bladder Symptom Score, KHQ; King’s Health Questionnaire

**Supplementary table 2. Repeated measures ANOVA results for bladder diary outcomes**

| **ITT population** | Effect | DF | F value | p-value |
| --- | --- | --- | --- | --- |
| 24-h day micturition frequency | Group | 1 | 1.34 | 0.7464 |
| Time | 4 | 27.04 | <0.0001 |
| Group X Time | 4 | 0.42 | 0.7960 |
| Daytime micturition frequency | Group | 1 | 0.02 | 0.8930 |
| Time | 4 | 19.57 | <0.0001 |
| Group X Time | 4 | 0.50 | 0.7375 |
| Nouturnal micturition frequency | Group | 1 | 1.13 | 0.2909 |
| Time | 4 | 6.90 | <0.0001 |
| Group X Time | 4 | 0.62 | 0.6554 |
| Urgency episodes | Group | 1 | 1.10 | 0.2974 |
| Time | 4 | 18.67 | <0.0001 |
| Group X Time | 4 | 0.90 | 0.4650 |
| Urgency urinary incontinence episodes | Group | 1 | 0.51 | 0.4763 |
| Time | 4 | 12.28 | <0.0001 |
| Group X Time | 4 | 0.75 | 0.5605 |

ANOVA; analysis of variance

**Supplementary table 3. Repeated measures ANOVA results for questionnaire outcomes**

| **ITT population** | Effect | DF | F value | p-value |
| --- | --- | --- | --- | --- |
| OABSS | Group | 1 | 2.25 | 0.1384 |
| Time | 4 | 51.11 | <0.0001 |
| Group X Time | 4 | 0.55 | 0.6988 |
| KHQ | Group | 1 | 1.83 | 0.1814 |
| Time | 4 | 49.31 | <0.0001 |
| Group X Time | 4 | 0.36 | 0.8372 |

ANOVA; analysis of variance, OABSS; Overactive bladder symptom score, KHQ; King's Health Questionnaire
